# Supplementary material for: Glyme–Li salt equimolar molten solvates with iodide/triiodide redox anions
Source: Royal Society of Chemistry journal article supplement (doi:10.1039/c9ra03580j), 2019-01-01
Supplement: c9ra03580j1.pdf [file c9ra03580j1.pdf]

**Electronic Supplementary Information (ESI)**

**Glyme-Li salt equimolar molten solvates with  
iodide/triiodide redox anions**

Keisuke Shigenobu, Azusa Nakanishi, Kazuhide Ueno,\* Kaoru Dokko, and Masayoshi Watanabe

Department of Chemistry and Biotechnology, Yokohama National University, 79-5 Tokiwadai,  
Hodogaya-ku, Yokohama 240-8501, Japan.

CORRESPONDING AUTHOR: To whom correspondence should be addressed. Telephone/Fax: +81-  
45-339-3951. E-mail: ueno-kazuhide-rc@ynu.ac.jp

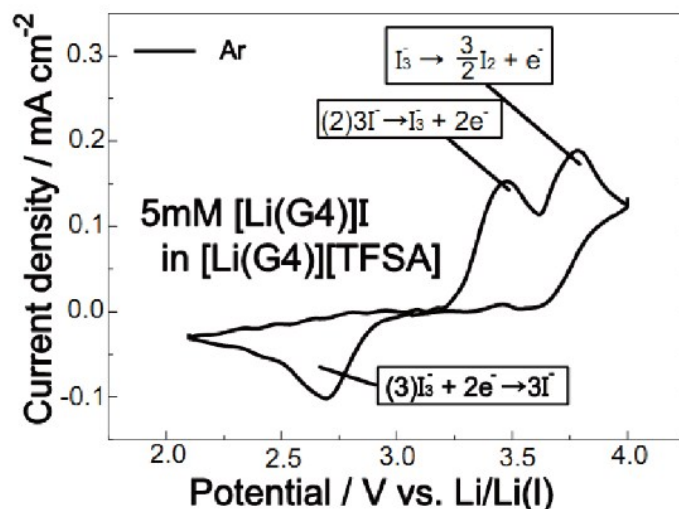

**Fig. S1** Cyclic voltammogram on Pt disk electrode of at a scan rate of  $10 \text{ mV s}^{-1}$  in  $[\text{Li}(\text{G4})][\text{TFSA}]$  containing  $5 \text{ mM } [\text{Li}(\text{G4})]\text{I}$ . Reference electrode:  $\text{Li}/\text{Li}^+$  in  $1 \text{ M LiTFSA}$  in G4 solution.

### Chemical diffusion coefficient of anions and ionicity

The limiting current value ( $|I_{\text{lim}}|$ ) are defined in eq. S1. The chemical diffusion coefficient was obtained by substituting the current value for the following:

$$|I_{\text{lim}}| = 4nFcDr_0 \quad (\text{S1})$$

where  $n$  denotes the number of electrons,  $F$  for Faraday constant,  $c$  for concentration of an anion,  $D$  for chemical diffusion coefficient and  $r_0$  for disk electrode radius.

The molar conductivity ratio (iconicity,  $A/A_{\text{NE}}$ ) was calculated by dividing the ideal ionic conductivity ( $A_{\text{NE}}$ ) into the experimental one ( $A$ ). Finally, these values are summarised in **Table S1**.

**Table S1** Diffusion coefficients, molar conductivities and ionicity of  $[\text{Li}(\text{G4Et})]\text{I}$  and  $[\text{Li}(\text{G4Et})]\text{I}_3$  at  $60 \text{ }^\circ\text{C}$ .

| Sample                               | $D_G$<br>[ $10^{-7} \text{ cm}^2 \text{ s}^{-1}$ ] | $D_{\text{Li}}$<br>[ $10^{-7} \text{ cm}^2 \text{ s}^{-1}$ ] | $D_{\text{anion}}$<br>[ $10^{-7} \text{ cm}^2 \text{ s}^{-1}$ ] | $A$<br>[ $\text{S cm}^2 \text{ mol}^{-1}$ ] | $A_{\text{NE}}$<br>[ $\text{S cm}^2 \text{ mol}^{-1}$ ] | $A/A_{\text{NE}}$<br>[-] |
|--------------------------------------|----------------------------------------------------|--------------------------------------------------------------|-----------------------------------------------------------------|---------------------------------------------|---------------------------------------------------------|--------------------------|
| $[\text{Li}(\text{G4Et})]\text{I}$   | 0.86                                               | 0.76                                                         | 4.36                                                            | 0.46                                        | 1.73                                                    | 0.27                     |
| $[\text{Li}(\text{G4Et})]\text{I}_3$ | 4.46                                               | 4.87                                                         | 2.84                                                            | 2.89                                        | 2.61                                                    | 1.11                     |

## Theoretical gravimetric capacity of catholyte.

Theoretical gravimetric capacity of catholyte ( $C_C$ ) is given below:

$$C_C [\text{mAh g}^{-1}] = 100nF/3600M_C \quad (\text{S2}),$$

where  $n$  indicates the number of moles relating to electron transfer,  $M_C$  for the total molecular weight of catholyte and  $F$  for Faraday constant. Thus, the capacity of  $[\text{Li}(\text{G4Et})]\text{I}_3$  was calculated to 85.91  $\text{mAh g}^{-1}$ .

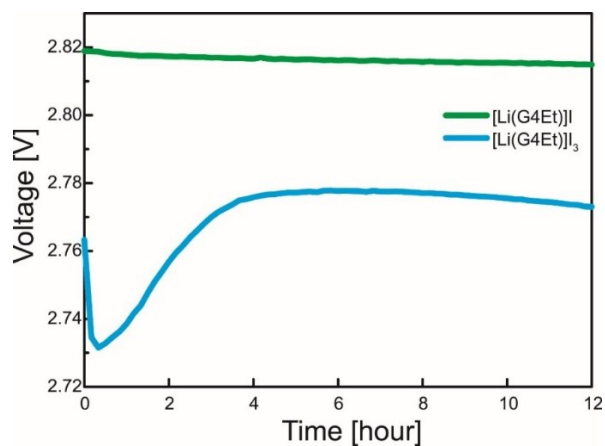

**Fig. S2** Time-dependent cell voltage of  $[\text{Li}(\text{G4Et})]\text{I}$  and  $[\text{Li}(\text{G4Et})]\text{I}_3$ .

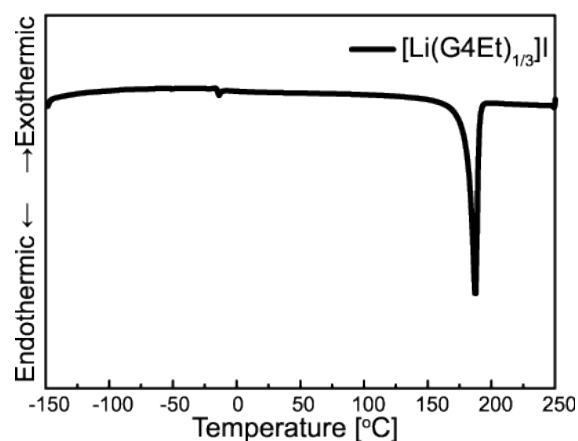

**Fig. S3** DSC curve of  $[\text{Li}(\text{G4Et})_{1/3}]\text{I}$ .

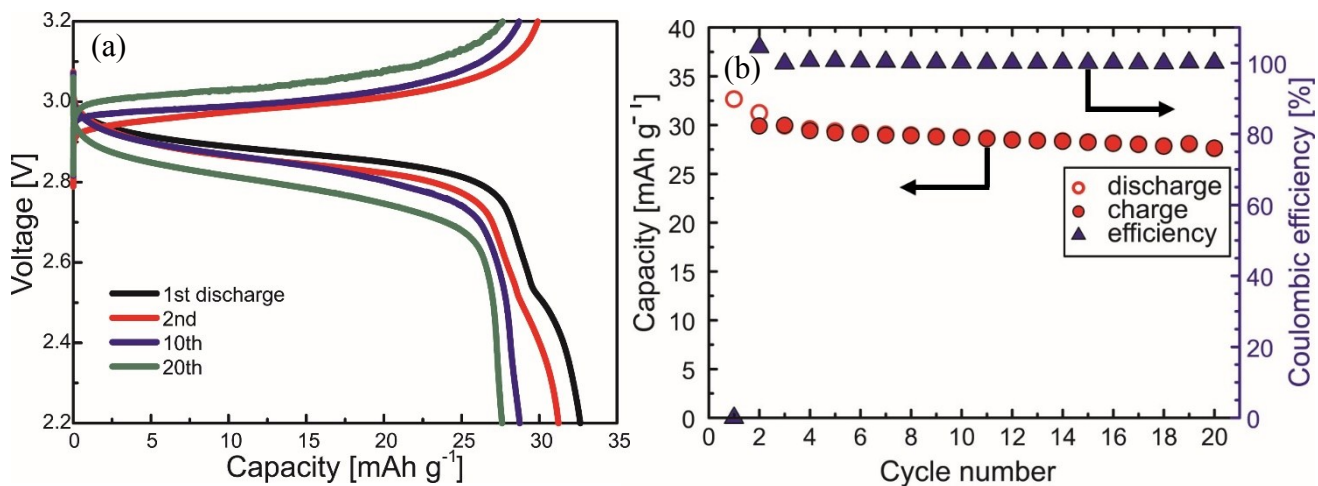

**Fig. S4** (a) Charge-discharge curves of Li | 1 mol dm<sup>-3</sup> Li[TFSA] in G4Et | LICGC | 1 mol dm<sup>-3</sup> LiI<sub>3</sub> in G4Et cell at 60 °C. (b) charge-discharge capacity and Coulombic efficiency as a function of cycle number.
